# Supplementary material for: Enzyme mimetic-catalyzed ATRP and its application in block copolymer synthesis combined with enzymatic ring-opening polymerization
Source: Royal Society of Chemistry journal article supplement (doi:10.1039/c5ra06548h), 2015-01-01
Supplement: c5ra06548h1.pdf [file c5ra06548h1.pdf]

## Electronic Supplementary Information

### Enzyme Mimetic-Catalyzed ATRP and Its Application in Block Copolymer Synthesis Combining with Enzymatic Ring-Opening Polymerization

Hang Zhou,<sup>a</sup> Wei Jiang,<sup>a</sup> An Ni,<sup>a</sup> Qiuping Zhang,<sup>a</sup> Shidong Xiang,<sup>a</sup> Liping Wang<sup>b</sup> and Jun Tang<sup>a\*</sup>

<sup>a</sup>Department of Polymer Science, College of Chemistry, and Jilin University, Jiefang Road 2519, Changchun, 130000 P. R. China

<sup>b</sup>College of Life Science, Jilin University, 2699 Qianjin Street, Changchun, 130000 P. R. China

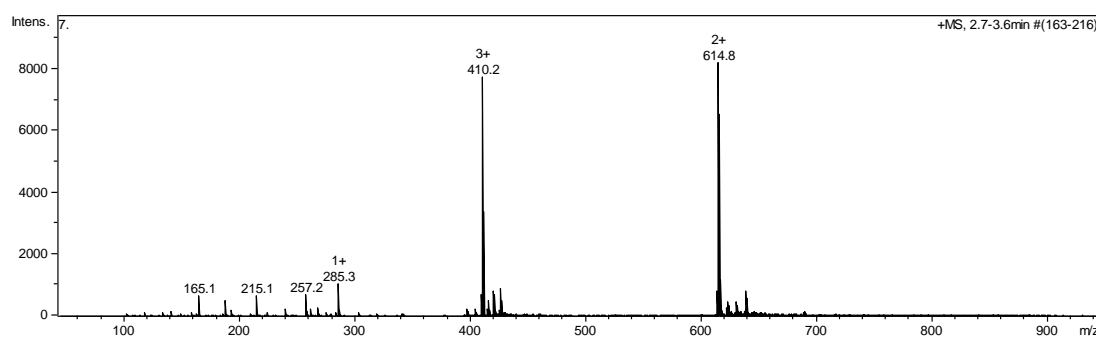

**Figure S1.** Mass spectrometry of DhHP-6 (molecular weight = 1229, performed on a liquid Chromatograph Mass Spectrometer, Agilent1290-microTOF Q II).

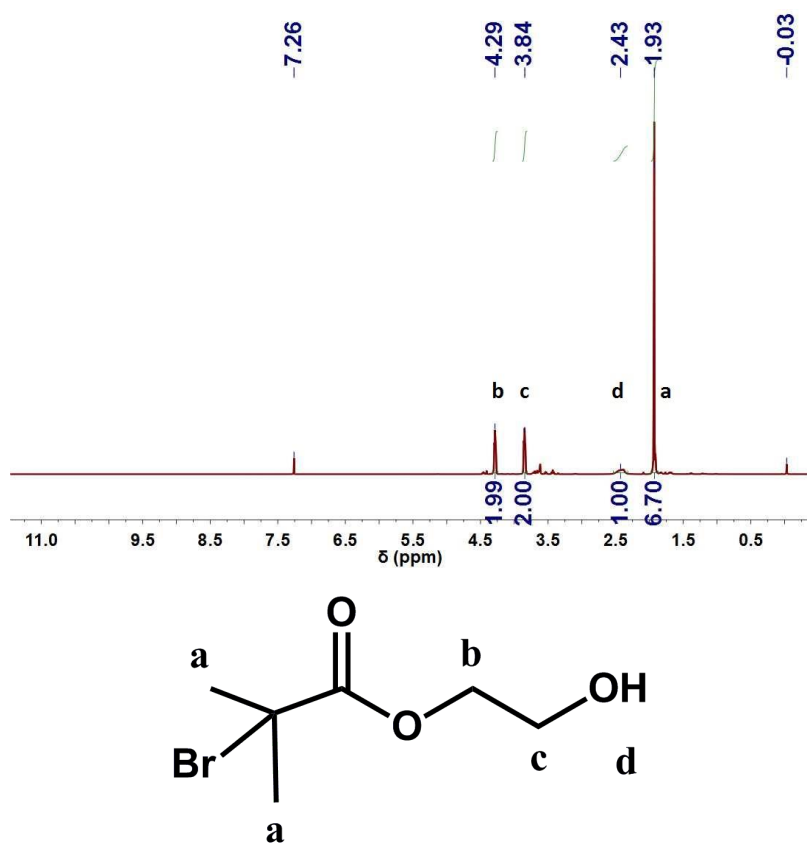

**Figure S2.**  $^1\text{H}$  NMR spectrum ( $\text{CDCl}_3$ , 400 MHz) of bifunctional initiator HEBiB.

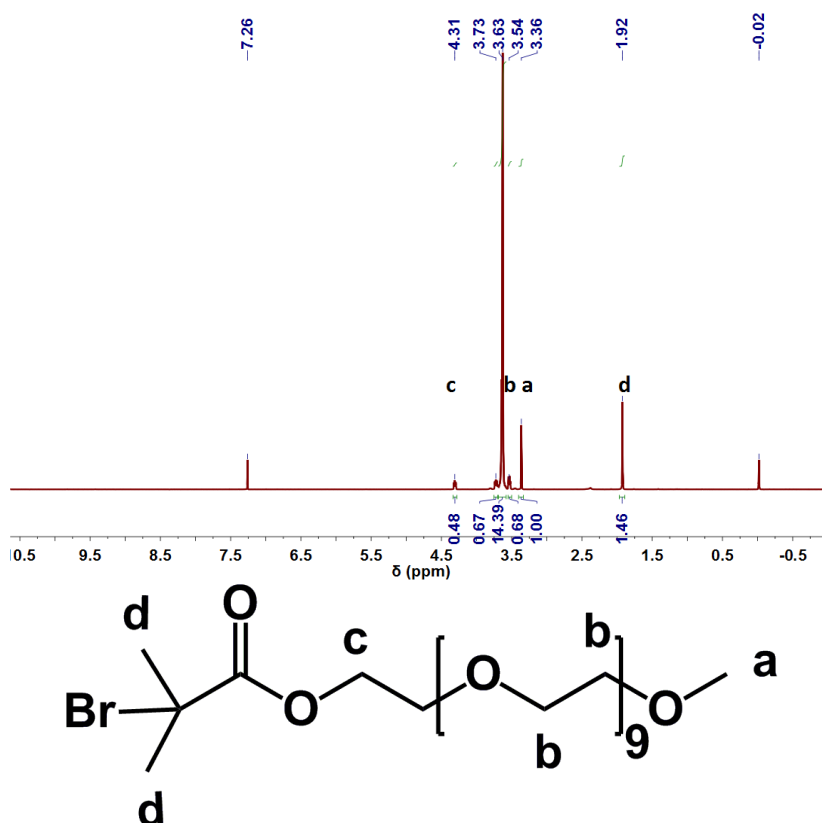

**Figure S3.** <sup>1</sup>H NMR spectrum (CDCl<sub>3</sub>, 400 MHz) of the macroinitiator PEG-Br.

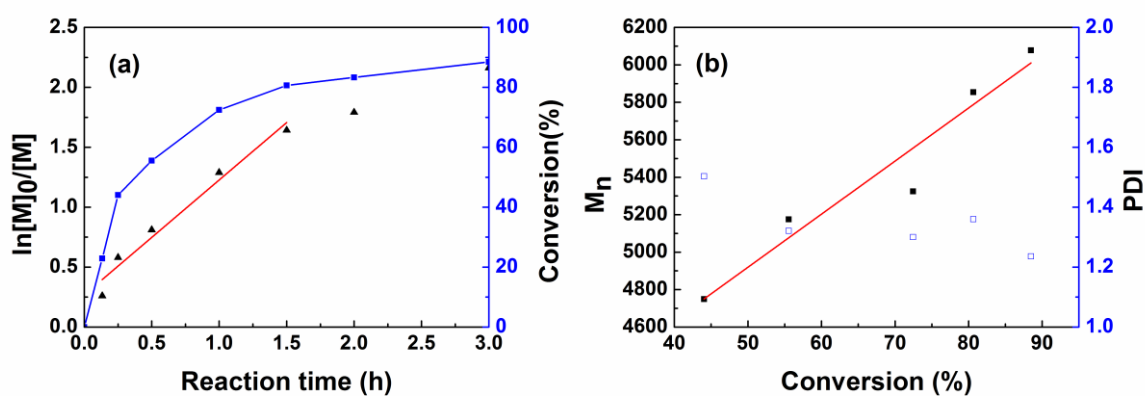

**Figure S4.** (a) First-order kinetic plot (▲) for DhHP-6 catalyzed ARGET ATRP of PEGMA<sub>500</sub> in PBS buffer (entry 2, pH = 7.0) and plot of monomer conversion vs. reaction time (■). (b) Number-average molecular weight (■) and PDI (□) of polyPEGMA vs. monomer conversion.

Note: [PEGMA<sub>500</sub>]/[EBiB]/[DhHP-6]/[AscNa]/[KBr]=32/1/0.033/1/8 at 35 °C.

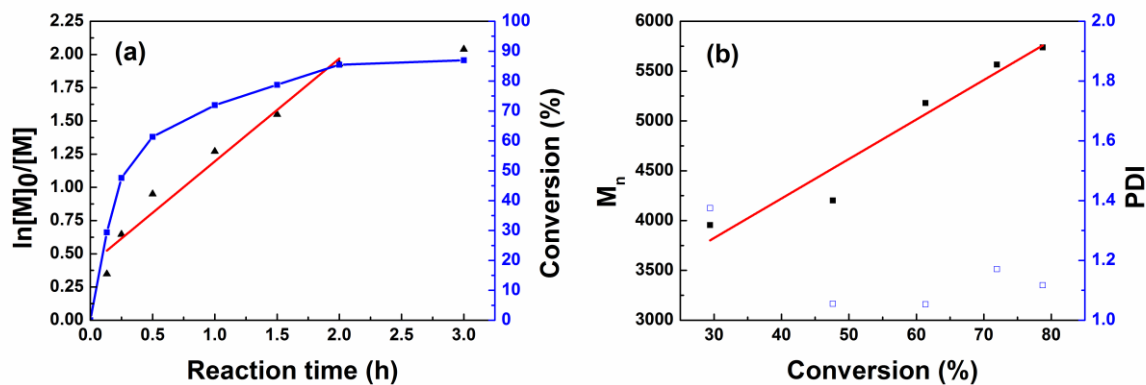

**Figure S5.** (a) First-order kinetic plot (▲) for DhHP-6 catalyzed ARGET ATRP of PEGMA<sub>500</sub> in PBS buffer (entry 3, pH = 7.5) and plot of monomer conversion vs. reaction time (■). (b) Number-average molecular weight (■) and PDI (□) of polyPEGMA vs. monomer conversion.

Note: [PEGMA<sub>500</sub>]/[EBiB]/[DhHP-6]/[AscNa]/[KBr] = 32/1/0.033/1/8 at 35 °C.

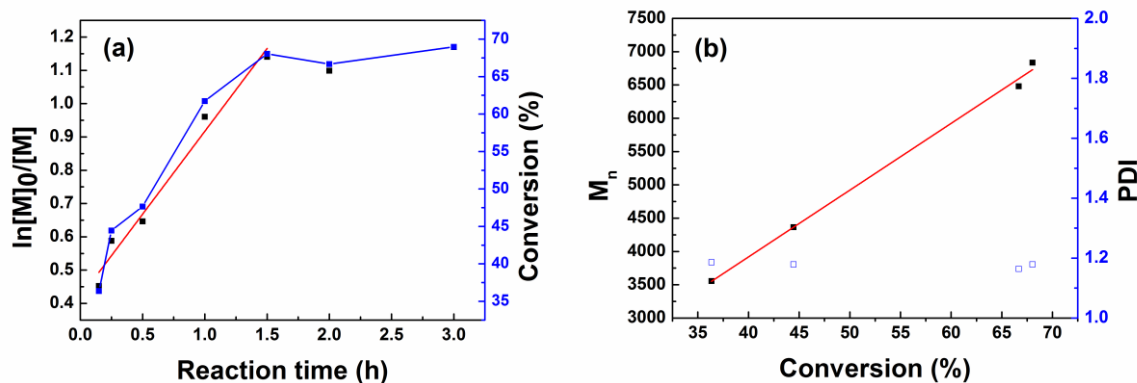

**Figure S6.** (a) First-order kinetic plot (▲) for DhHP-6 catalyzed ARGET ATRP of PEGMA<sub>500</sub> in PBS buffer (entry 4) and plot of monomer conversion vs. reaction time (■). (b) Number-average molecular weight (■) and PDI (□) of polyPEGMA vs. monomer conversion.

Note : [PEGMA<sub>500</sub>]/[EBiB]/[DhHP-6]/[AscNa]/[KBr]=64/1/0.033/1/8 at 35 °C.

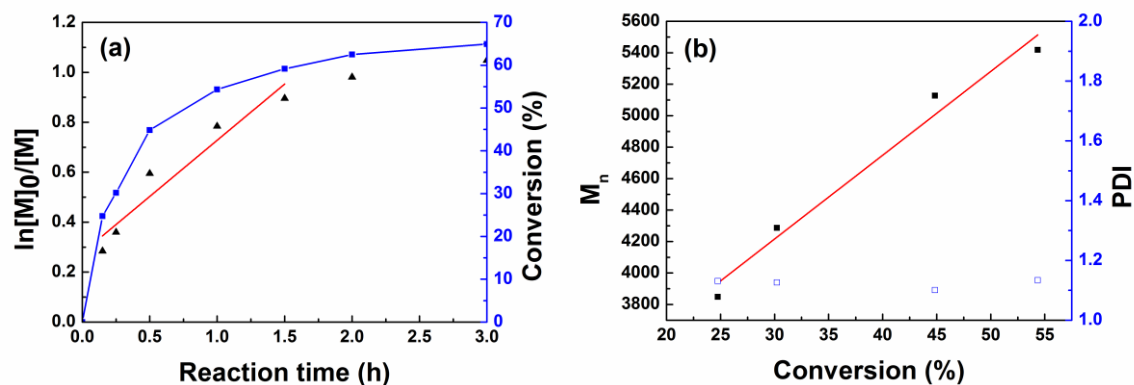

**Figure S7.** (a) First-order kinetic plot ( $\blacktriangle$ ) for DhHP-6 catalyzed tARGET ATRP of PEGMA<sub>500</sub> in PBS buffer (entry 5) and plot of monomer conversion vs. reaction time ( $\blacksquare$ ). (b) Number-average molecular weight ( $\blacksquare$ ) and PDI ( $\square$ ) of polyPEGMA vs. monomer conversion.

Note: [PEGMA<sub>500</sub>]/[EBiB]/[DhHP-6]/[AscNa]/[KBr]=64/1/0.033/1/4 at 35 °C.

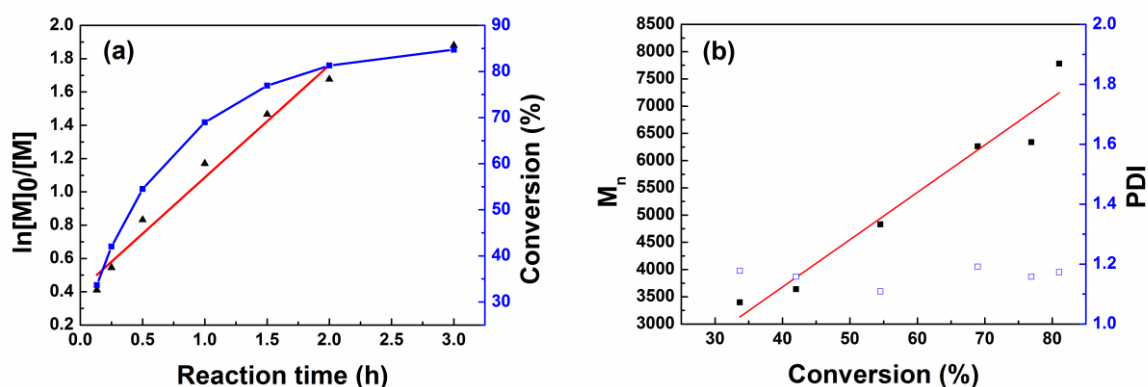

**Figure S8.** (a) First-order kinetic plot ( $\blacktriangle$ ) for DhHP-6 catalyzed ATRP of PEGMA<sub>500</sub> in PBS buffer (entry 6) and plot of monomer conversion vs. reaction time ( $\blacksquare$ ). (b) Number-average molecular weight ( $\blacksquare$ ) and PDI ( $\square$ ) of polyPEGMA vs. monomer conversion.

Note: [PEGMA<sub>500</sub>]/[EBiB]/[DhHP-6]/[AscNa]/[KBr] =64/1/0.033/1/2 at 35 °C.

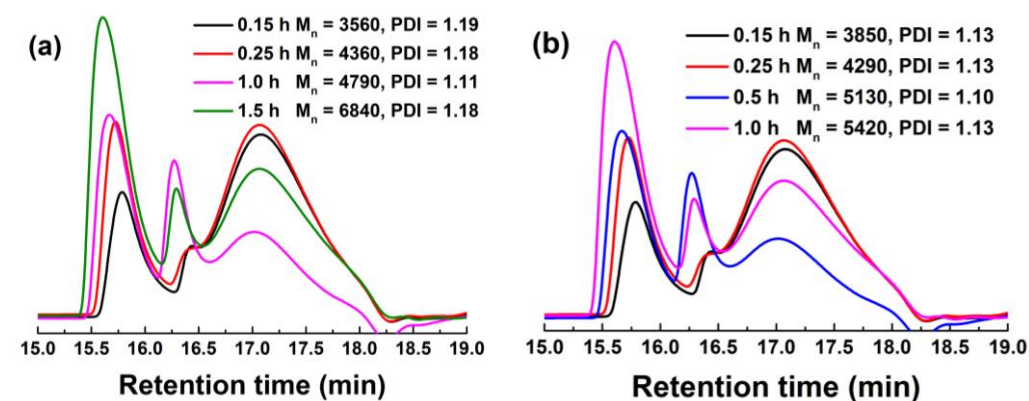

**Figure S9.** GPC traces of DhHP-6 catalyzed ARGET ATRP.

Note: (a)  $[\text{PEGMA}_{500}]/[\text{EBiB}]/[\text{DhHP-6}]/[\text{AscNa}]/[\text{KBr}] = 64/1/0.033/1/8$  at  $35\text{ }^{\circ}\text{C}$  (Table 1, entry 4); (b)  $[\text{PEGMA}_{500}]/[\text{EBiB}]/[\text{DhHP-6}]/[\text{AscNa}]/[\text{KBr}] = 64/1/0.033/1/4$  at  $35\text{ }^{\circ}\text{C}$  (Table 1, entry 5).

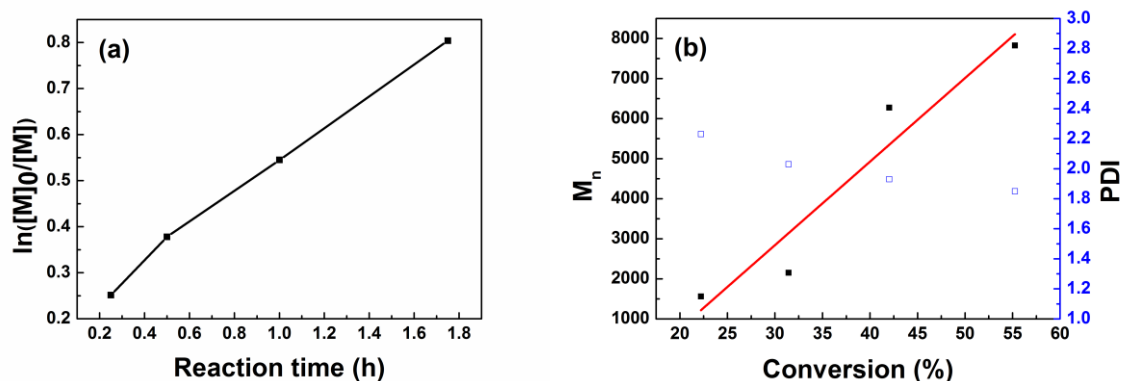

**Figure S10.** (a) First-order kinetic plot (■) for DhHP-6 catalyzed ARGET ATRP of GMA in DMF and (b) Number-average molecular weight (■) and PDI (□) of polyPEGMA vs. monomer conversion.

Note:  $[\text{GMA}]_0/[\text{EBiB}]/[\text{DhHP-6}]/[\text{Asc}] = 100/1/0.03/2$  at  $40\text{ }^{\circ}\text{C}$ .

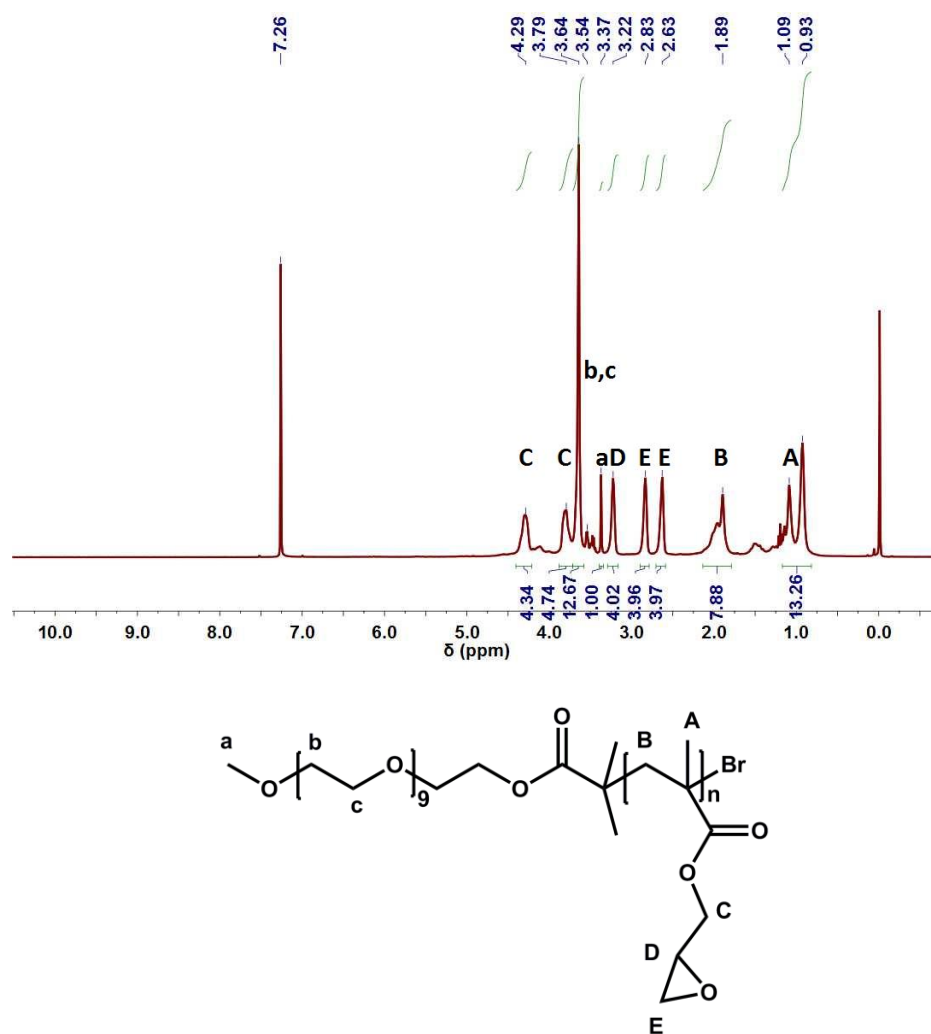

**Figure S11.** <sup>1</sup>H NMR spectrum (CDCl<sub>3</sub>, 400 MHz) of purified PEG-PGMA sample obtained by DhHP-6 catalyzed ARGET ATRP using PEG-Br as macroinitiator.

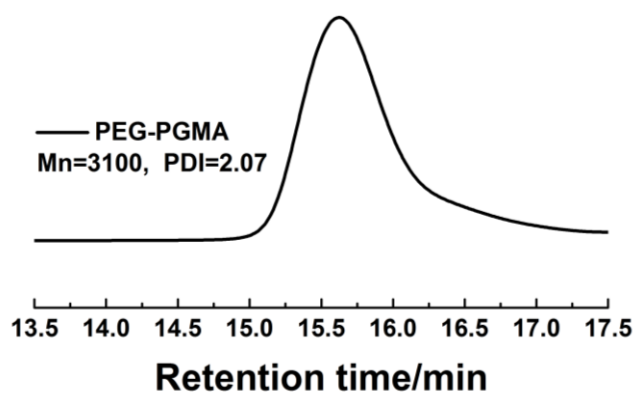

**Figure S12.** GPC trace of PEG-PGMA catalyzed by DhHP-6.

Note: [GMA]/[PEG-Br]/[DhHP-6]/[Asc] = 58:1:0.05:1.25, reaction temperature = 40 °C in a mixed solvent of DMF-H<sub>2</sub>O (DMF:H<sub>2</sub>O=7.5:1).

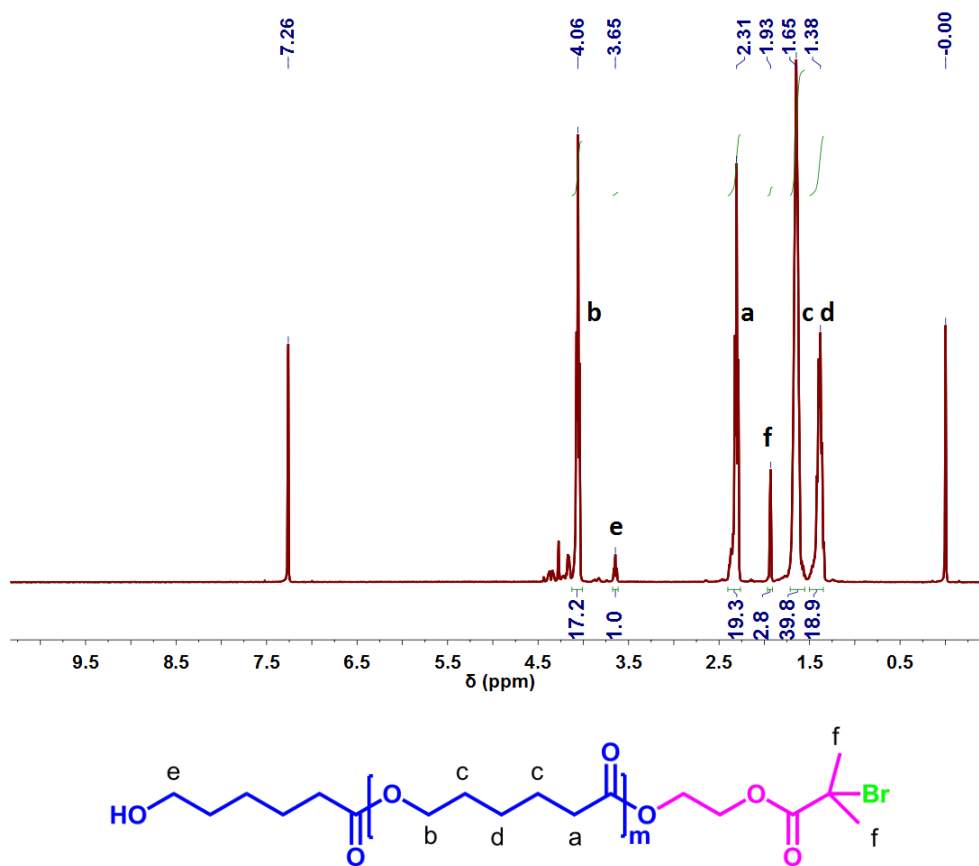

**Figure S13.**  $^1\text{H}$  NMR spectrum ( $\text{CDCl}_3$ , 400 MHz) of purified PCL-Br sample obtained by eROP using HEBiB as precursors.



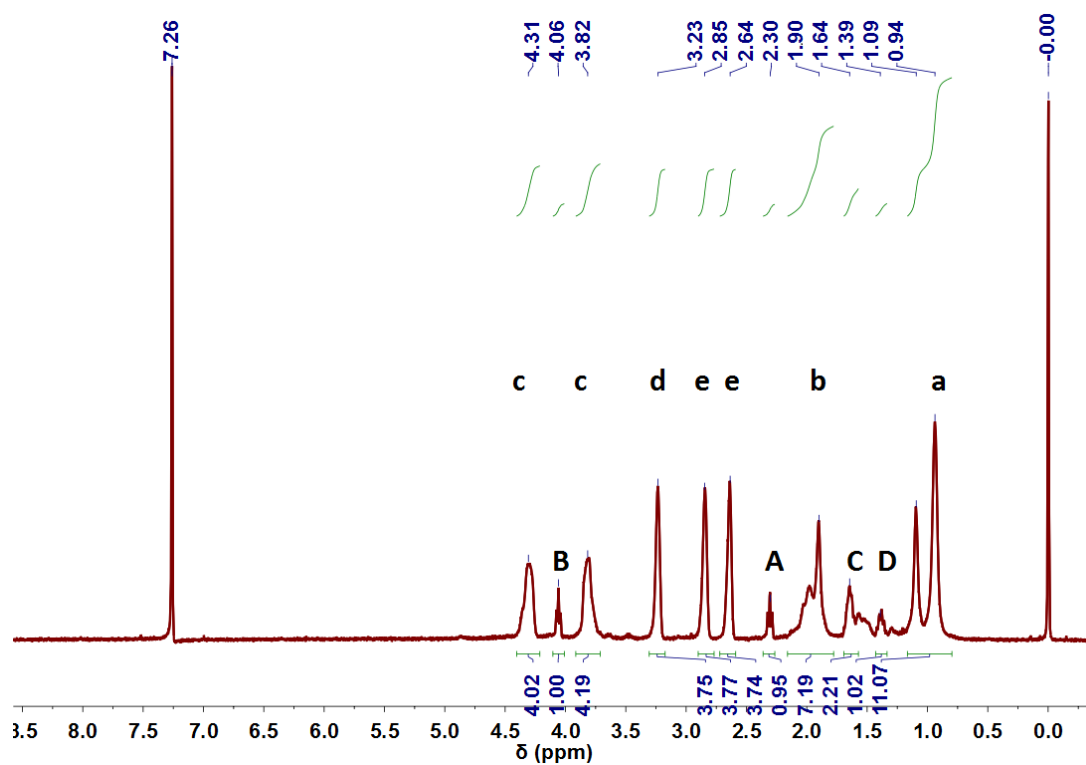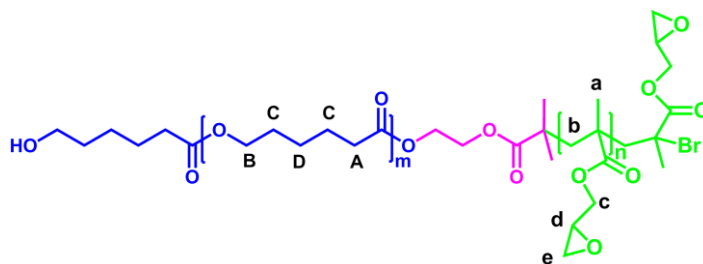

**Figure S14.**  $^1\text{H}$  NMR spectrum ( $\text{CDCl}_3$ , 400 MHz) of PCL-PGMA copolymer obtained the combination of eROP and DhHP-6 catalyzed ARGET ATRP in  $\text{DMF-H}_2\text{O}$ .

Note:  $[\text{GMA}]/[\text{PCL-Br}]/[\text{DhHP-6}]/[\text{Asc}] = 66:1:0.088:5.43$ ,  $50^\circ\text{C}$ .

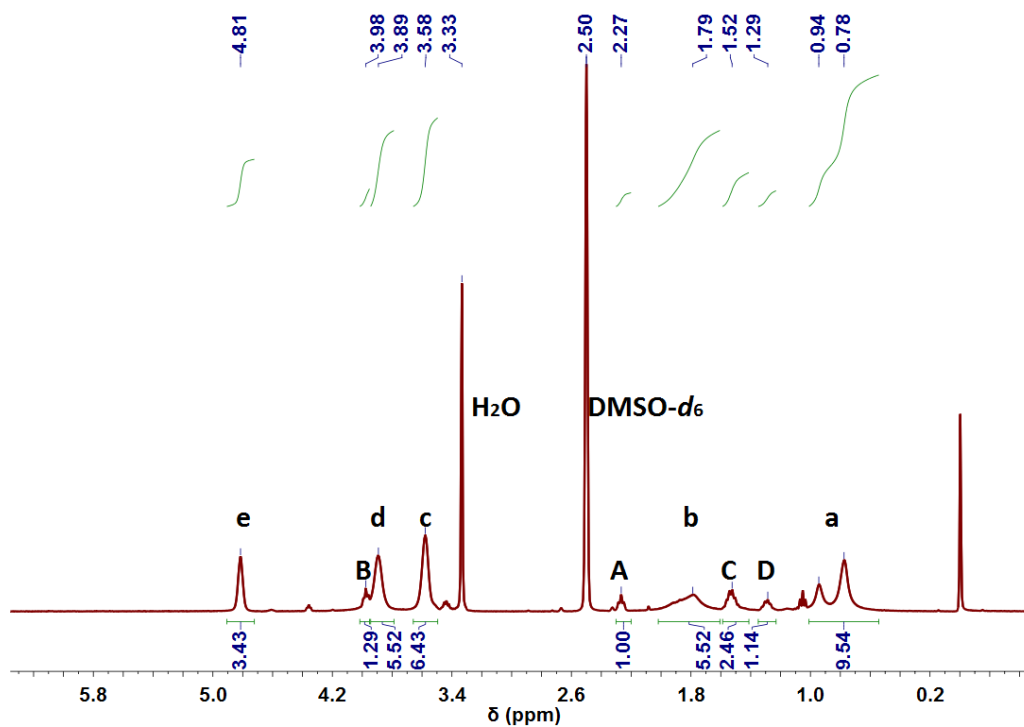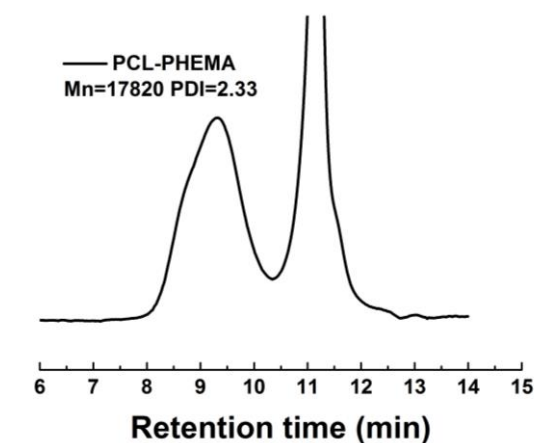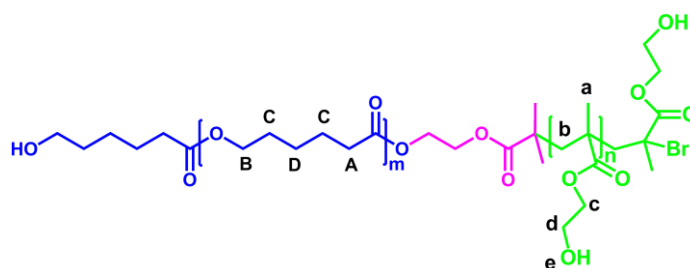

**Figure S15.**  $^1\text{H}$  NMR spectrum ( $\text{DMSO-}d_6$ , 400 MHz) of amphiphilic copolymer, PCL-PHEMA, by the combination of eROP and DhHP-6 catalyzed ARGET ATRP in  $\text{DMF-H}_2\text{O}$  and GPC trace of PCL-PHEMA.

Note:  $[\text{HEMA}]/[\text{PCL-Br}]/[\text{DhHP-6}]/[\text{Asc}] = 87:1:0.08:3.23$ ,  $50^\circ\text{C}$ .

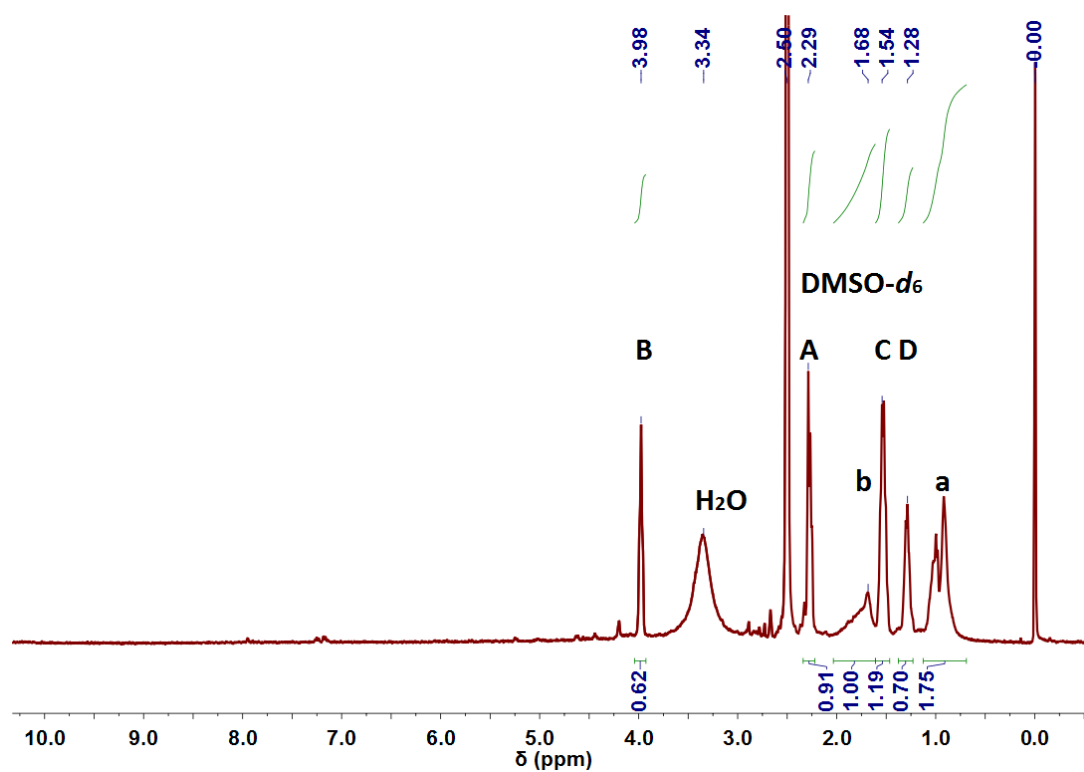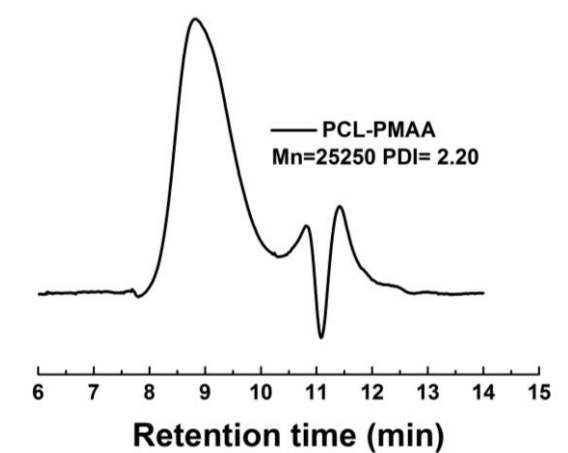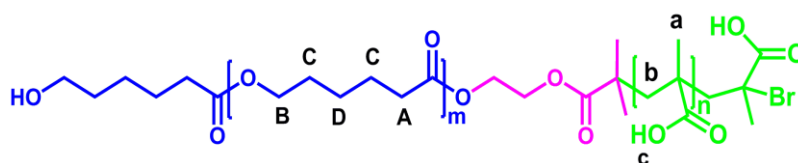

**Figure S16.**  $^1\text{H}$  NMR spectrum ( $\text{DMSO-}d_6$ , 400 MHz) of amphiphilic copolymer, PCL-PMAA, by the combination of eROP and DhHP-6 catalyzed ARGET ATRP in  $\text{DMF-H}_2\text{O}$  and GPC trace of PCL-PMAA.

Note:  $[\text{MAA}]/[\text{PCL-Br}]/[\text{DhHP-6}]/[\text{Asc}] = 107:1:0.068:3.7$ ,  $50\text{ }^\circ\text{C}$ .

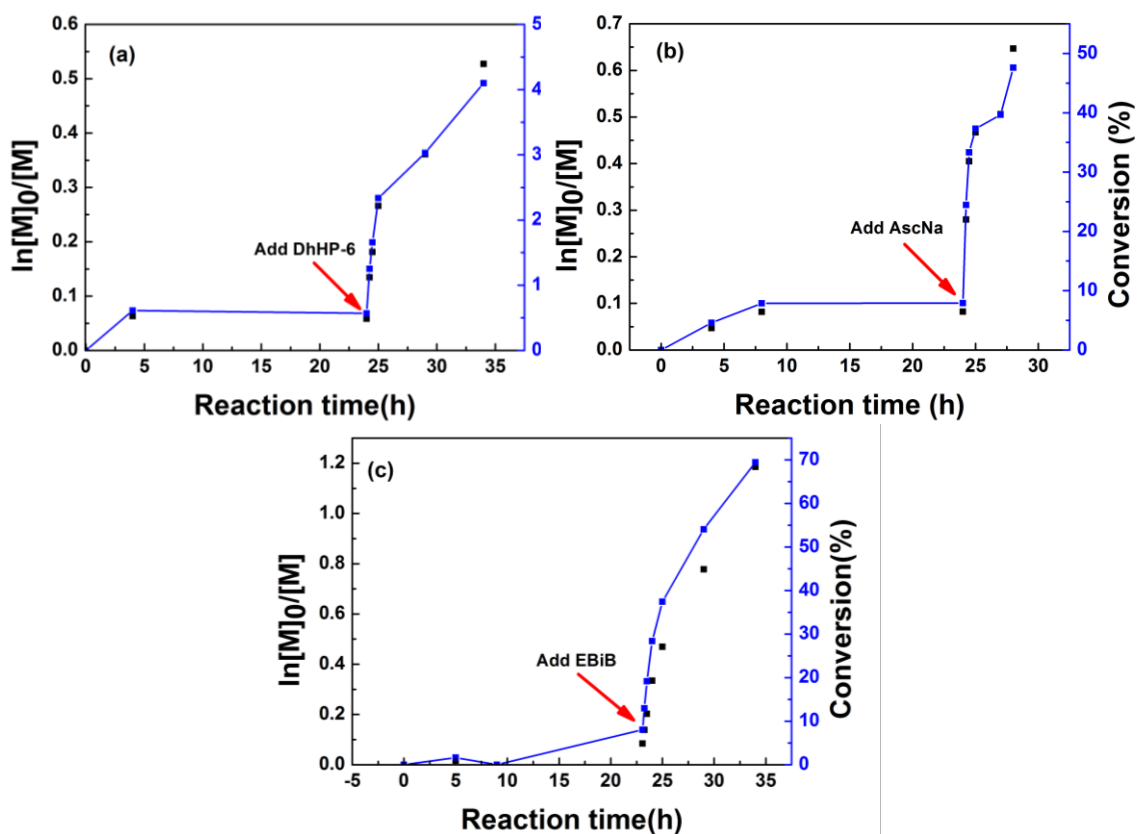

**Figure S17.** Control experiments and results (a) control experiment without the addition of DhHP-6; (b) control experiment without the addition of AscNa; (c) control experiment without the addition of EBiB (see Table 1, entries 8-10 for detailed conditions).

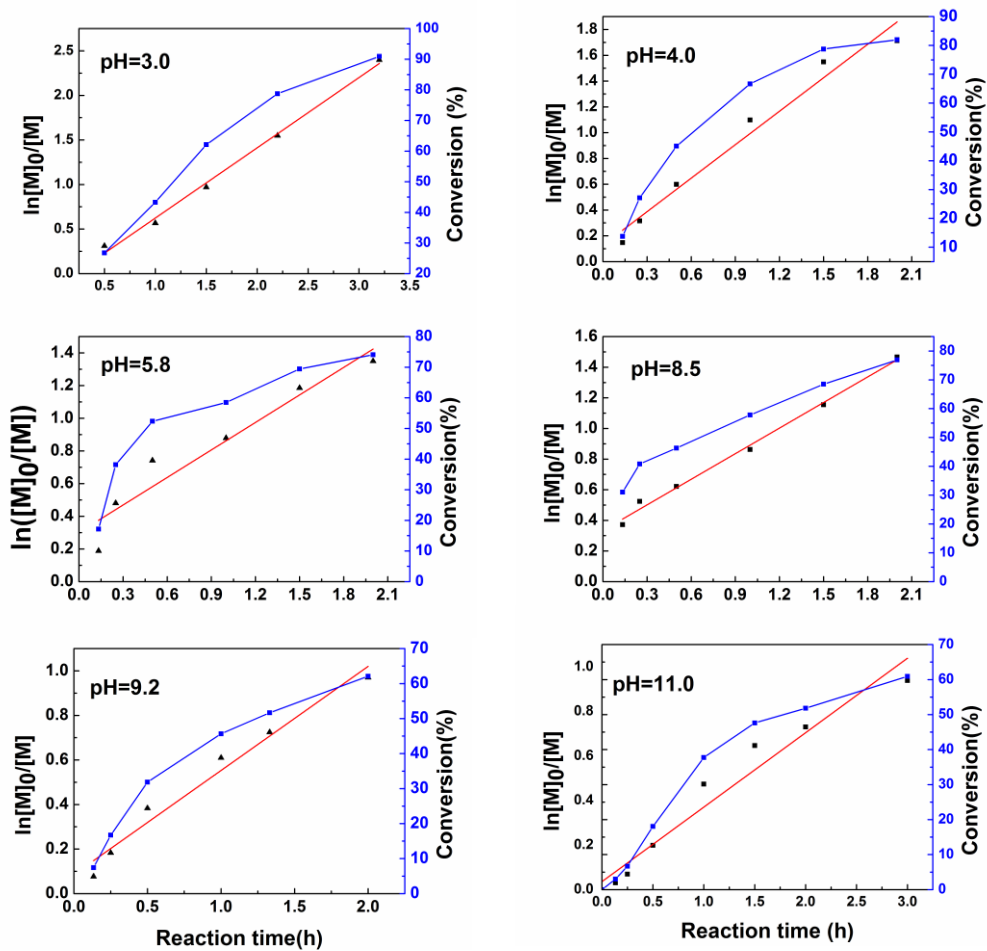

**Figure S18.** First-order kinetic plot ( $\blacktriangle$ ) for enzyme mimic catalyzed ARGET ATRP of PEGMA<sub>500</sub> in PBS at different pHs (marked on each Figure), and plot of monomer conversion vs reaction time ( $\blacksquare$ ).

Note:  $[\text{PEGMA}_{500}]/[\text{EBiB}]/[\text{DhHP-6}]/[\text{AscNa}]/[\text{KBr}] = 32/1/0.033/1/8$  at 35 °C.

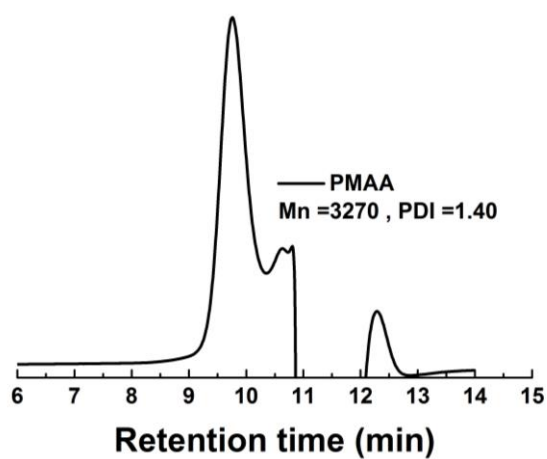

**Figure S19.** GPC trace of PMAA obtained by DhHP-6 catalyzed ARGET ATRP (THF as mobile phase,  $1 \text{ mL min}^{-1}$ ).

Note:  $[\text{MAA}]/[\text{EBiB}]/[\text{DhHP-6}]/[\text{Asc}] = 171/1/0.032/1.6$  at  $50 \text{ }^\circ\text{C}$ , in  $\text{DMF:H}_2\text{O} = 7.5:1$ .
